# Supplementary material for: PTR-MS measurements of non-methane volatile organic compounds during an intensive field campaign at the summit of Mount Tai, China, in June 2006
Source: Copernicus journal article supplement (doi:10.5194/acp-10-7085-2010), 2010-08-03
Supplement: Supplementary file 1 [file acp-10-7085-2010-supplement.pdf]

Supplement to:

**PTR-MS measurements of non-methane volatile organic compounds during an intensive field campaign at the summit of Mount Tai, China, in June 2006**

**S. Inomata<sup>1</sup>, H. Tanimoto<sup>1</sup>, S. Kato<sup>2</sup>, J. Suthawaree<sup>2</sup>, Y. Kanaya<sup>3</sup>, P. Pochanart<sup>3</sup>, Y. Liu<sup>3</sup>, and Z. Wang<sup>4</sup>**

<sup>1</sup> National Institute for Environmental Studies, 16-2, Onogawa, Tsukuba, Ibaraki 305-8506, Japan

<sup>2</sup> Tokyo Metropolitan University, Minami-osawa 1-1, Hachioji, Tokyo 192-0397, Japan

<sup>3</sup> Research Institute for Global Change, Japan Agency for Marine-Earth Science and Technology, 3173-25, Showa-machi, Yokohama, Kanagawa 236-0001, Japan

<sup>4</sup> LAPC/NZC, Institute of Atmospheric Physics, Chinese Academy of Sciences, Beijing 10029, China

Correspondence to: S. Inomata (ino@nies.go.jp)

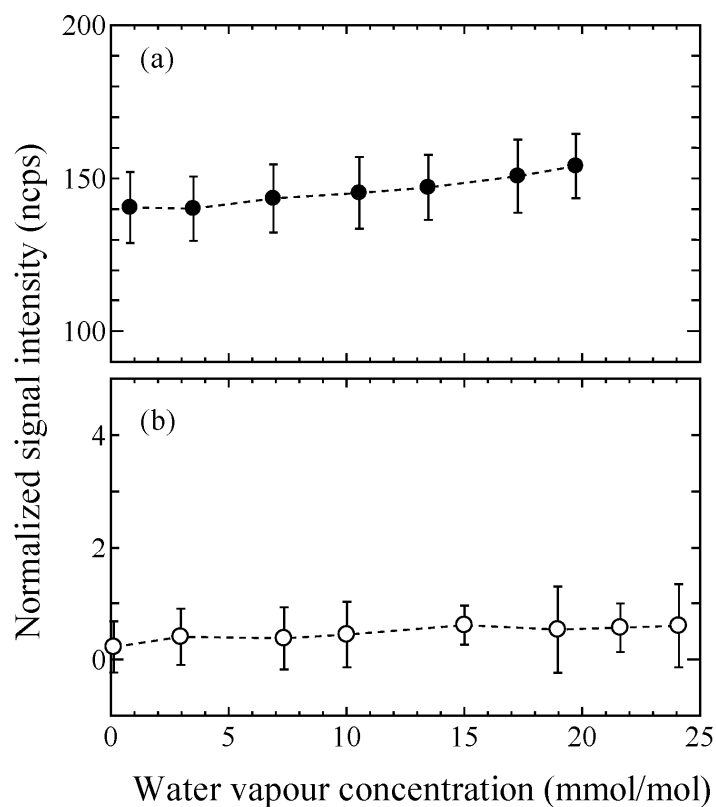

Figure 1S. Humidity dependence of the normalized signal intensity at  $m/z$  69 (a) with isoprene (22 ppbv) and (b) without isoprene

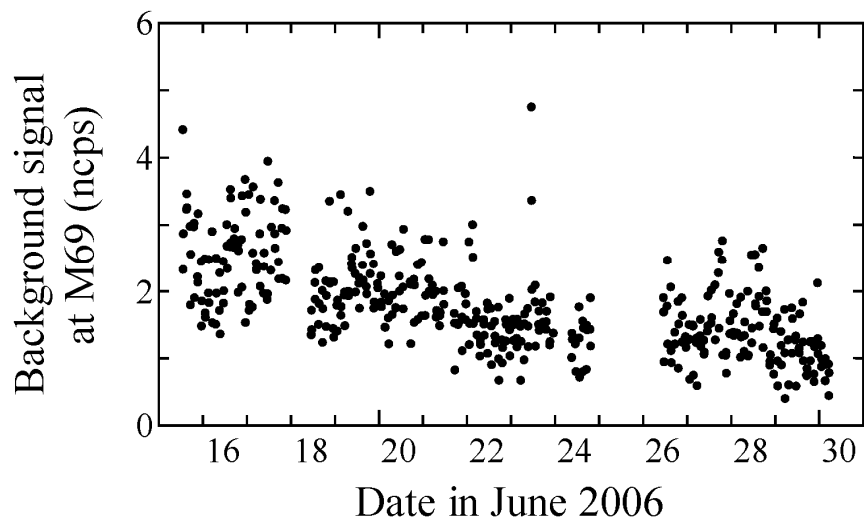

Figure 2S. Temporal variations of the background signals at  $m/z$  69 during the field measurement.
